# Supplementary material for: Changes in IgG and total plasma protein glycomes in acute systemic inflammation
Source: PubMed Central journal article supplement — Sci Rep. 2014 Mar 11;4:4347. doi: 10.1038/srep04347 (PMC3949295; doi:10.1038/srep04347), 2014-03-11
Supplement: srep04347-s1.pdf [file srep04347-s1.pdf]

## **Changes in IgG and total plasma protein glycomes in acute systemic inflammation**

Mislav Novokmet, Edita Lukić, Frano Vučković, Željko Đurić, Toma Keser, Katarina Rajšl, Daniel Remondini, Gastone Castellani, Hrvoje Gašparović, Olga Gornik and Gordan Lauc

**Supplementary Information (Supplementary figure 1; Supplementary figure 2; Supplementary table 1; Supplementary table 2; Supplementary table 3)**



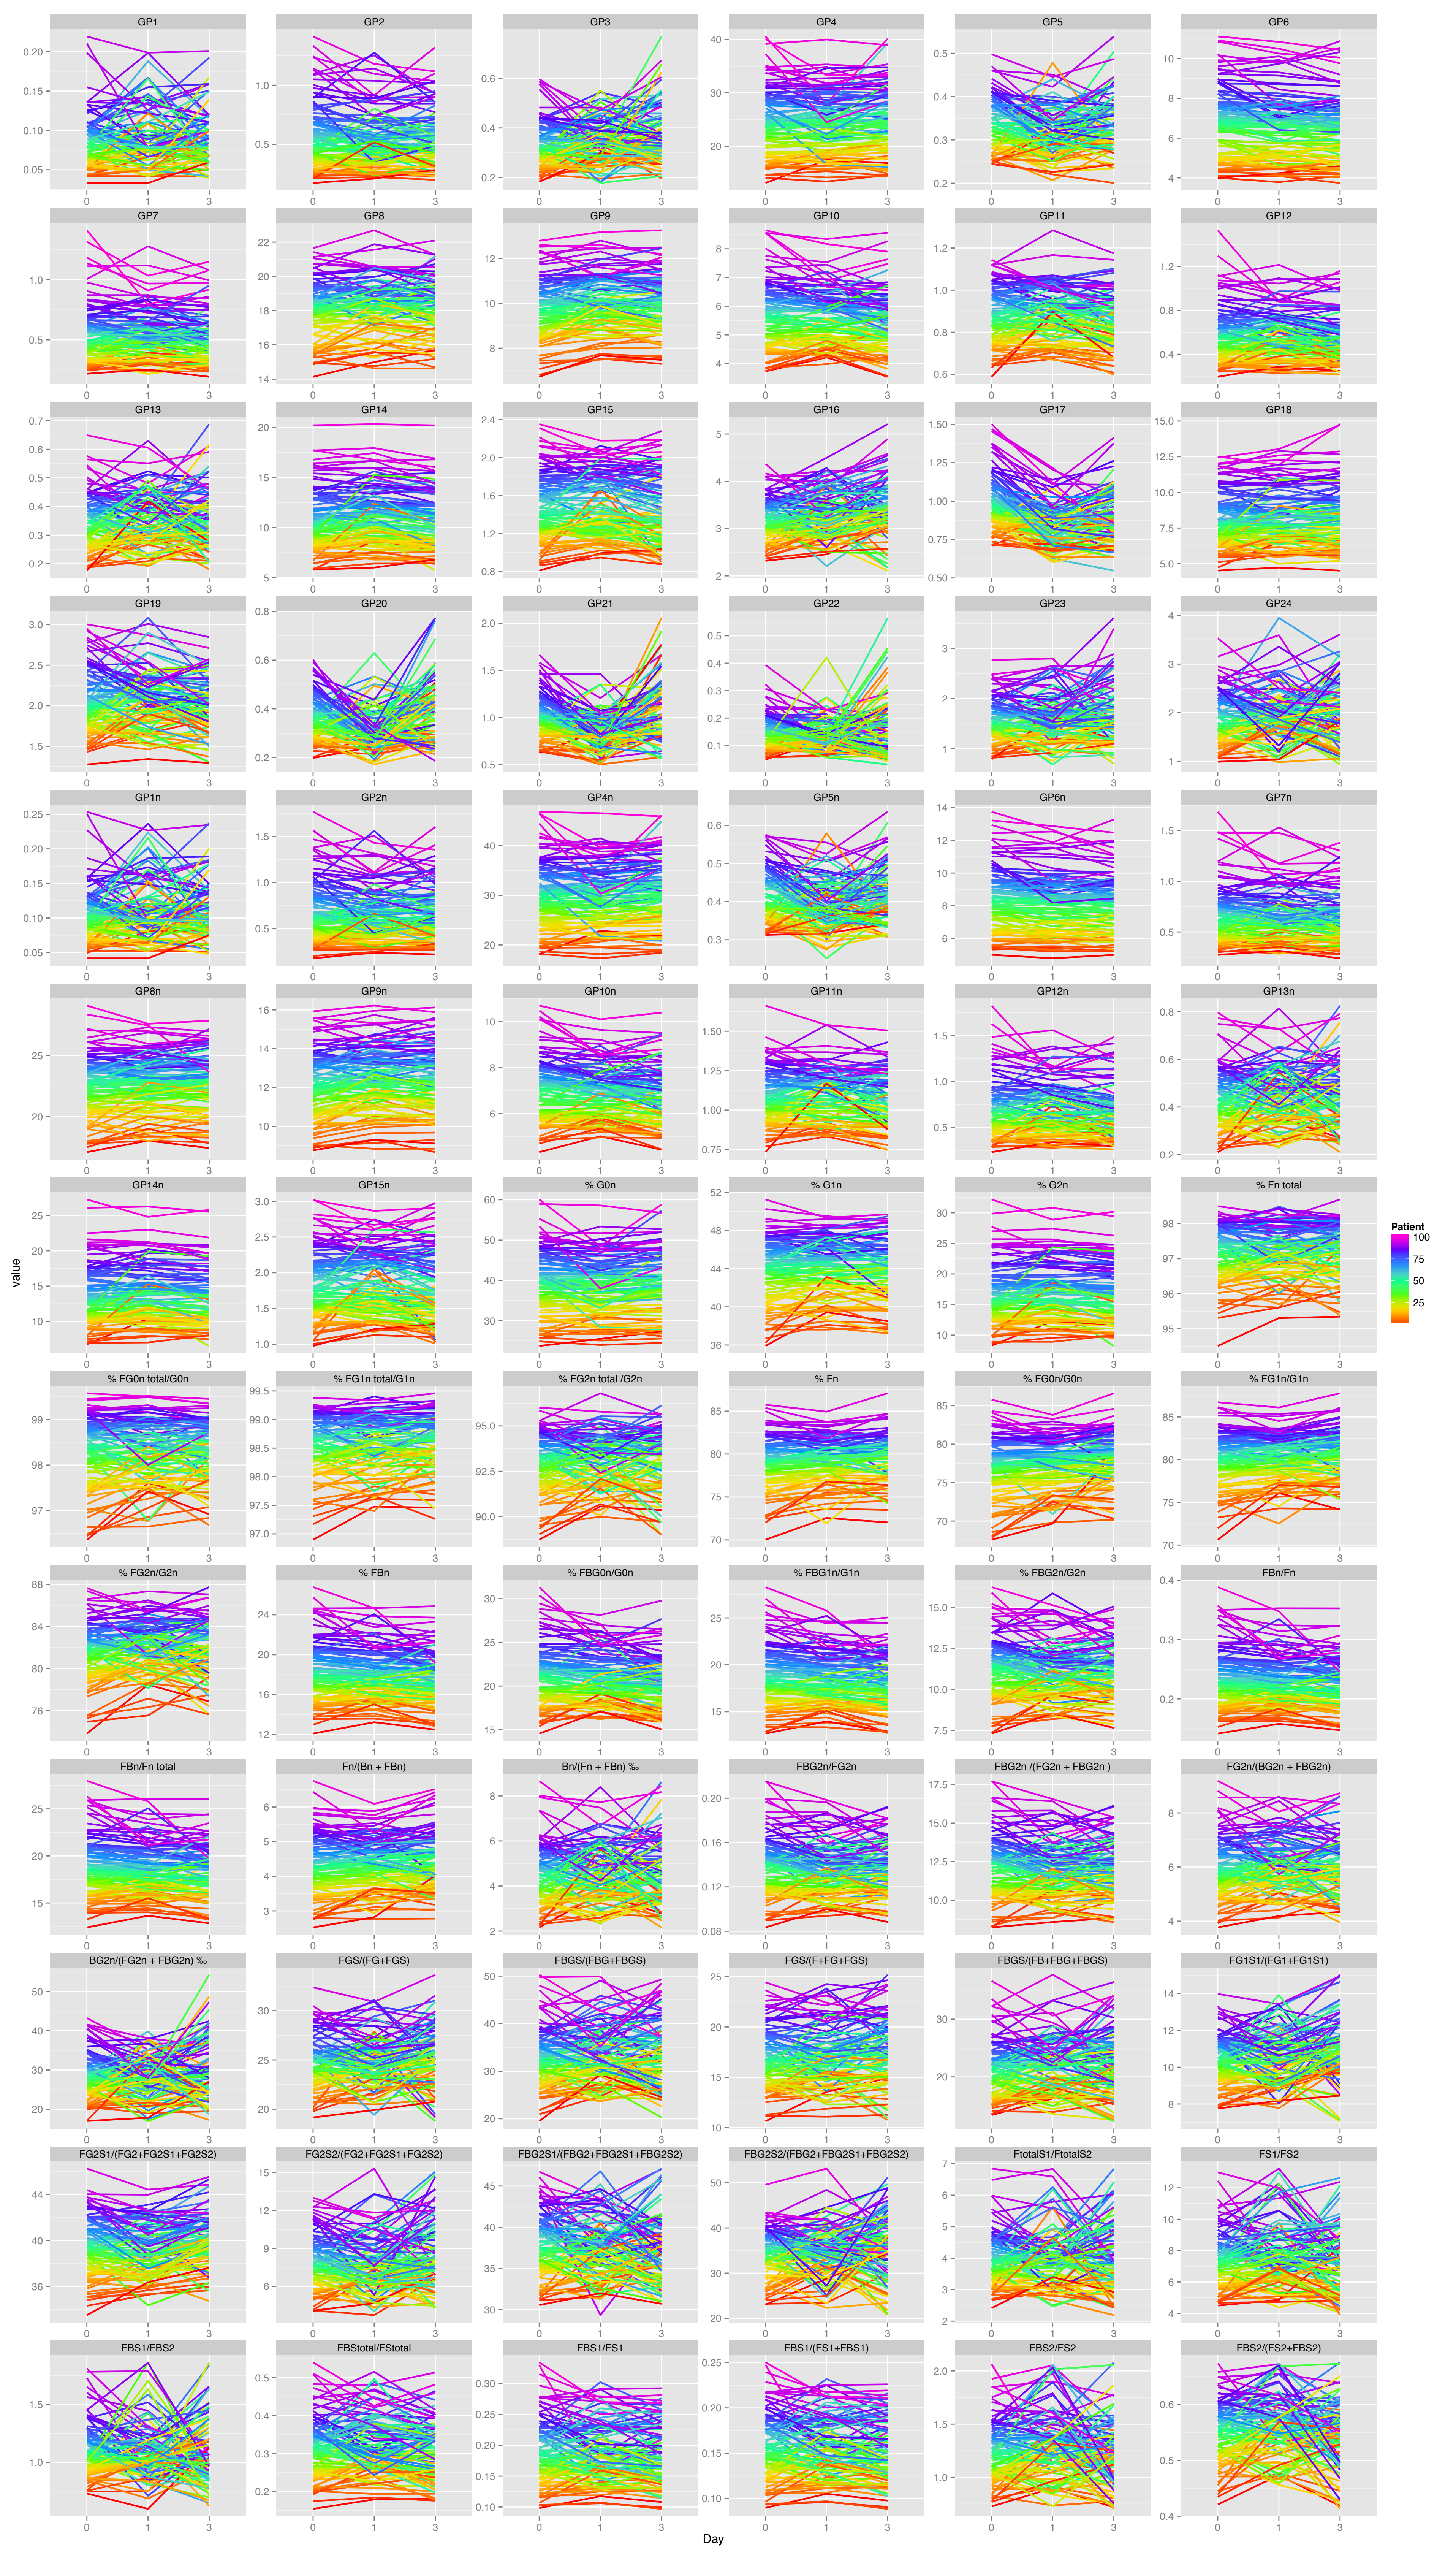



**Supplementary figure 1.** Changes in *N*-linked IgG glycans through the initial phase of acute inflammatory response induced by cardiac surgery. Day 0 represents level of glycan group before surgical procedure, day 1 on the first day after the surgical procedure and day 3 on the third day after the surgery. The same patient is not represented by the same colour in all graphs, but a same spectrum is used for better visualisation.

Derived glycosylation traits were approximated from the ratios of glycan peaks (G1-G24) each of which combined the glycans with the same structural characteristics (see Figure 4). The percentage of sialylation of fucosylated galactosylated structures without bisecting GlcNAc in total IgG glycans-FGS / (FG + FGS) =  $\text{SUM}(\text{GP16} + \text{GP18} + \text{GP23}) / \text{SUM}(\text{GP16} + \text{GP18} + \text{GP23} + \text{GP8} + \text{GP9} + \text{GP14}) * 100$ ; the percentage of sialylation of fucosylated galactosylated structures with bisecting GlcNAc in total IgG glycans-FBGS / (FBG + FBGS) =  $\text{SUM}(\text{GP19} + \text{GP24}) / \text{SUM}(\text{GP19} + \text{GP24} + \text{GP10} + \text{GP11} + \text{GP15}) * 100$ ; the percentage of sialylation of all fucosylated structures without bisecting GlcNAc in total IgG glycans-FGS / (F + FG + FGS) =  $\text{SUM}(\text{GP16} + \text{GP18} + \text{P23}) / \text{SUM}(\text{GP16} + \text{GP18} + \text{GP23} + \text{GP4} + \text{GP8} + \text{GP9} + \text{GP14}) * 100$ ; the percentage of sialylation of all fucosylated structures with bisecting GlcNAc in total IgG glycans-FBGS / (FB + FBG + FBGS) +  $\text{SUM}(\text{GP19} + \text{GP24}) / \text{SUM}(\text{GP19} + \text{GP24} + \text{GP6} + \text{GP10} + \text{GP11} + \text{GP15}) * 100$ ; the percentage of monosialylation of fucosylated monogalactosylated structures in total IgG glycans-FG1S1 / (FG1 + FG1S1) =  $\text{GP16} / \text{SUM}(\text{GP16} + \text{GP8} + \text{GP9}) * 100$ ; the percentage of monosialylation of fucosylated digalactosylated structures in total IgG glycans-FG2S1 / (FG2 + FG2S1 + FG2S2) =  $\text{GP18} / \text{SUM}(\text{GP18} + \text{GP14} + \text{GP23}) * 100$ ; the percentage of disialylation of fucosylated digalactosylated structures in total IgG glycans-FG2S2 / (FG2 + FG2S1 + FG2S2) =  $\text{GP23} / \text{SUM}(\text{GP23} + \text{GP14} + \text{GP18}) * 100$ ; the percentage of monosialylation of fucosylated digalactosylated structures with bisecting GlcNAc in total IgG glycans-FBG2S1 / (FBG2 + FBG2S1 + FBG2S2) =  $\text{GP19} / \text{SUM}(\text{GP19} + \text{GP15} + \text{GP24}) * 100$ ; the percentage of disialylation of fucosylated digalactosylated structures with bisecting GlcNAc in total IgG glycans-FBG2S2 / (FBG2 + FBG2S1 + FBG2S2) =  $\text{GP24} / \text{SUM}(\text{GP24} + \text{GP15} + \text{GP19}) * 100$ ; ratio of all fucosylated ( $\pm$  bisecting GlcNAc) monosialylated and disialylated structures in total IgG glycans-F<sup>total</sup>S1/F<sup>total</sup>S2 =  $\text{SUM}(\text{GP16} + \text{GP18} + \text{GP19}) / \text{SUM}(\text{GP23} + \text{GP24})$ ; ratio of fucosylated (without bisecting GlcNAc) monosialylated and disialylated structures in total IgG glycans-FS1/FS2 =  $\text{SUM}(\text{GP16} + \text{GP18}) / \text{GP23}$ ; ratio of fucosylated (with bisecting GlcNAc) monosialylated and disialylated structures in total IgG glycans - FBS1 / FBS2 =  $\text{GP19} / \text{GP24}$ ; ratio of all fucosylated sialylated structures with and without bisecting GlcNAc-FBS<sup>total</sup> / FS<sup>total</sup> =  $\text{SUM}(\text{GP19} + \text{GP24}) / \text{SUM}(\text{GP16} + \text{GP18} + \text{GP23})$ ; ratio of fucosylated monosialylated structures with and without bisecting GlcNAc-FBS1 / FS1 =  $\text{GP19} / \text{SUM}(\text{GP16} + \text{GP18})$ ; the incidence of bisecting GlcNAc in all fucosylated monosialylated structures in total IgG glycans-FBS1 / (FS1 + FBS1) =  $\text{GP19} / \text{SUM}(\text{GP16} + \text{GP18} + \text{GP19})$ ; ratio of fucosylated disialylated structures with and without bisecting GlcNAc - FBS2 / FS2 =  $\text{GP24} / \text{GP23}$ ; the incidence of bisecting GlcNAc in all fucosylated disialylated structures in total IgG glycans - FBS2 / (FS2 + FBS2) =  $\text{GP24} / \text{SUM}(\text{GP23} + \text{GP24})$ . The following derived traits were approximated only from the ratios of glycan peaks containing neutral glycan as a major structure. First, the percentage of each neutral glycan peak (GP1<sup>n</sup>-GP15<sup>n</sup>) was calculated from the total neutral glycan fraction (SUM(GP1:GP15)) and then traits were defined as: the percentage of agalactosylated structures in total neutral glycan fraction - G0<sup>n</sup> =  $\text{SUM}(\text{GP1}^n + \text{GP2}^n + \text{GP4}^n + \text{GP6}^n)$ ; the percentage of monogalactosylated structures in total neutral glycan fraction - G1<sup>n</sup> =  $\text{SUM}(\text{GP7}^n + \text{GP8}^n + \text{GP9}^n + \text{GP10}^n + \text{GP11}^n)$ ; the percentage of digalactosylated structures in total neutral glycan fraction - G2<sup>n</sup> =  $\text{SUM}(\text{GP12}^n + \text{GP13}^n + \text{GP14}^n + \text{GP15}^n)$ .

$(GP12^n + GP13^n + GP14^n + GP15^n)$ ; the percentage of all fucosylated ( $\pm$  bisecting GlcNAc) structures in total neutral glycan fraction -  $F^{n\text{ total}} = \text{SUM}(GP1^n + GP4^n + GP6^n + GP8^n + GP9^n + GP10^n + GP11^n + GP14^n + GP15^n)$ ; the percentage of fucosylation of agalactosylated structures -  $FG0^{n\text{ total}} / G0 = \text{SUM}(GP1^n + GP4^n + GP6^n) / G0n * 100$ ; the percentage of fucosylation of monogalactosylated structures -  $FG1^{n\text{ total}} / G1^n = \text{SUM}(GP8^n + GP9^n + GP10^n + GP11^n) / G1n * 100$ ; the percentage of fucosylation of digalactosylated structures -  $FG2^{n\text{ total}} / G2^n = \text{SUM}(GP14^n + GP15^n) / G2^n * 100$ ; the percentage of fucosylated (without bisecting GlcNAc) structures in total neutral glycan fraction -  $F^n = \text{SUM}(GP1^n + GP4^n + GP8^n + GP9^n + GP14^n)$ ; the percentage of fucosylation (without bisecting GlcNAc) of agalactosylated structures -  $FG0^n / G0^n = \text{SUM}(GP1^n + GP4^n) / G0^n * 100$ ; the percentage of fucosylation (without bisecting GlcNAc) of monogalactosylated structures -  $FG1^n / G1^n = \text{SUM}(GP8^n + GP9^n) / G1^n * 100$ ; the percentage of fucosylation (with-out bisecting GlcNAc) of digalactosylated structures -  $FG2^n / G2^n = GP14^n / G2^n * 100$ ; the percentage of fucosylated (with bisecting GlcNAc) structures in total neutral glycan fraction -  $FB^n = \text{SUM}(GP6^n + GP10^n + GP11^n + GP15^n)$ ; the percentage of fucosylation (with bisecting GlcNAc) of agalactosylated structures -  $FBG0^n / G0^n = GP6^n / G0^n * 100$ ; the percentage of fucosylation (with bisecting GlcNAc) of monogalactosylated structures -  $FBG1^n / G1^n = \text{SUM}(GP10^n + GP11^n) / G1^n * 100$ ; the percentage of fucosylation (with bisecting GlcNAc) of digalactosylated structures -  $FBG2^n / GP2^n = GP15^n / G2^n * 100$ ; ratio of fucosylated structures with and without bisecting GlcNAc -  $FB^n / F^n = FB^n / F^n$ ; the incidence of bisecting GlcNAc in all fucosylated structures in total neutral glycan fraction -  $FB^n / F^{n\text{ total}} = FB^n / F^n \text{ total} * 100$ ; ratio of fucosylated non-bisecting GlcNAc structures and all structures with bisecting GlcNAc -  $F^n / (B^n + FB^n) = F^n / (GP13^n + FB^n)$ ; ratio of structures with bisecting GlcNAc and all fucosylated structures ( $\pm$  bisecting GlcNAc) -  $B^n / (F^n + FB^n) (\%) = GP13^n / (F^n + \% FB^n) * 1000$ ; ratio of fucosylated digalactosylated structures with and without bisecting GlcNAc -  $FBG2^n / FG2^n = GP15^n / GP14^n$ ; the incidence of bisecting GlcNAc in all fucosylated digalactosylated structures in total neutral glycan fraction -  $FBG2^n / (FG2^n + FBG2^n) = GP15^n / (GP14^n + GP15^n) + 100$ ; ratio of fucosylated digalactosylated nonbisecting GlcNAc structures and all digalactosylated structures with bisecting GlcNAc -  $FG2^n / (BG2^n + FBG2^n) = GP14^n / (GP13^n + GP15^n)$ ; ratio of digalactosylated structures with bisecting GlcNAc and all fucosylated digalactosylated structures ( $\pm$  bisecting GlcNAc) -  $BG2^n / (FG2^n + FBG2^n) (\%) = GP13^n / (GP14^n + GP15^n) * 1000$ .

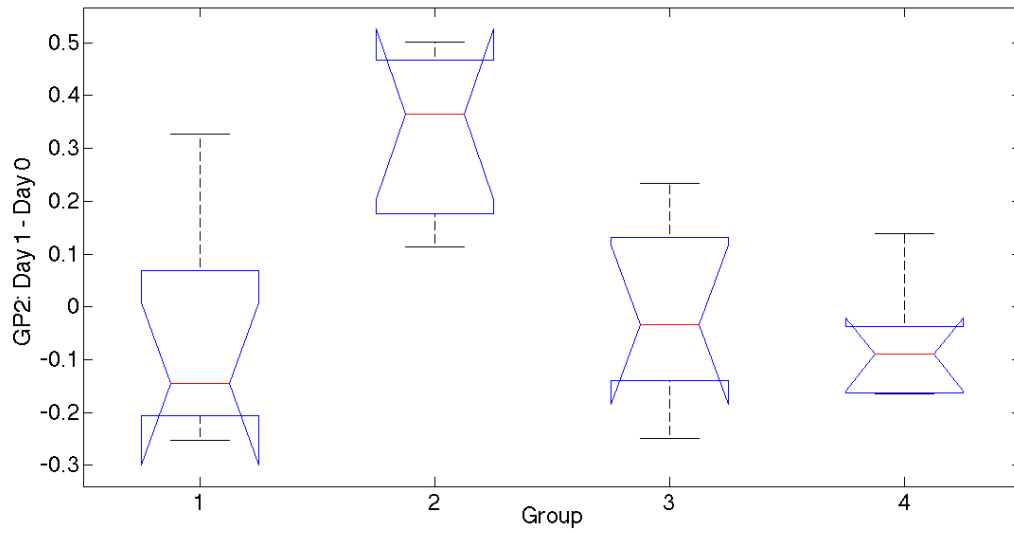

**Supplementary figure 2.** Shows the boxplot for the 4 patient groups with respect to the GP2 peak in the data obtained by the difference in values at Day 1 and Day 0. x axis: group label (1-4); y axis: values of the differences between Day 1 and Day 0 for GP2 for each sample.

**Supplemental table 1.** Average values for each HILIC-UPLC separated glycan group released from total plasma proteins, for each studied day. Statistically significance was set at  $P < 0.05$ .

| Glycan | Day 0 | Day 1 | Day 3 | p<br>(Day 0 - Day 1) | p<br>(Day 0 - Day 3) |
|--------|-------|-------|-------|----------------------|----------------------|
| GP7    | 9.66  | 8.31  | 7.34  | <0.01                | <0.01                |
| GP8    | 11.06 | 10.02 | 8.02  | <0.01                | <0.01                |
| GP9    | 51.55 | 58.65 | 60.71 | <0.01                | <0.01                |
| GP10   | 7.76  | 7.23  | 6.22  | <0.01                | <0.01                |
| GP11   | 2.19  | 1.53  | 1.42  | <0.01                | <0.01                |
| GP12   | 1.44  | 0.85  | 0.91  | <0.01                | <0.01                |
| GP13   | 4.82  | 4.09  | 3.71  | <0.01                | <0.01                |
| GP14   | 8.73  | 7.63  | 10.14 | <0.01                | <0.01                |
| GP15   | 0.40  | 0.31  | 0.31  | <0.01                | <0.01                |
| GP16   | 1.62  | 2.23  | 3.06  | <0.01                | <0.01                |

**Supplementary table 2.** Average values for each HILIC-UPLC separated glycan group released from IgG, for each studied day are given. The P values indicate that for majority of glycan groups statistically significant difference(  $P < 0.05$ ) occur between day 0 and day 1, which is not the case for the difference between day 3 and day 0. These results show that majority glycans released from IgG, change during first 24 hours of inflammatory response and then come back to their preinflammatory levels.

| Glycan group | Day 0 | Day 1 | Day 3 | p<br>(Day 0 - Day 1) | p<br>(Day 0 - Day 3) |
|--------------|-------|-------|-------|----------------------|----------------------|
| GP1          | 0.08  | 0.09  | 0.09  | <0.001               | <0.001               |
| GP2          | 0.49  | 0.48  | 0.50  | 0.50                 | 0.35                 |
| GP3          | 0.34  | 0.34  | 0.39  | 0.57                 | 0.01                 |
| GP4          | 22.03 | 21.53 | 22.03 | 0.02                 | 1.00                 |
| GP5          | 0.35  | 0.32  | 0.35  | <0.001               | 0.91                 |
| GP6          | 5.93  | 5.71  | 5.63  | <0.001               | <0.001               |
| GP7          | 0.51  | 0.52  | 0.51  | 0.25                 | 0.87                 |
| GP8          | 18.32 | 18.41 | 18.24 | 0.26                 | 0.39                 |
| GP9          | 9.45  | 9.72  | 9.54  | <0.001               | 0.04                 |
| GP10         | 5.71  | 5.64  | 5.51  | 0.14                 | <0.001               |
| GP11         | 0.82  | 0.84  | 0.81  | <0.001               | 0.36                 |
| GP12         | 0.55  | 0.58  | 0.56  | 0.02                 | 0.46                 |
| GP13         | 0.39  | 0.40  | 0.40  | 0.16                 | 0.25                 |
| GP14         | 11.16 | 11.80 | 11.01 | <0.001               | 0.25                 |
| GP15         | 1.49  | 1.54  | 1.47  | <0.001               | 0.25                 |
| GP16         | 3.03  | 3.13  | 3.28  | 0.03                 | <0.001               |
| GP17         | 1.07  | 0.90  | 0.96  | <0.001               | <0.001               |
| GP18         | 8.18  | 8.50  | 8.45  | <0.001               | 0.02                 |
| GP19         | 2.00  | 2.08  | 2.04  | 0.01                 | 0.24                 |
| GP20         | 0.42  | 0.34  | 0.44  | <0.001               | 0.24                 |
| GP21         | 0.92  | 0.75  | 0.89  | <0.001               | 0.38                 |
| GP22         | 0.17  | 0.16  | 0.17  | 0.78                 | 0.87                 |
| GP23         | 1.45  | 1.46  | 1.55  | 0.88                 | 0.03                 |
| GP24         | 1.70  | 1.78  | 1.76  | 0.15                 | 0.27                 |

**Supplemental table 3.** Coefficients of variations in studied population for each glycan group on day 0 and day 1.  $\Delta$  CV % indicates for how many percentages CV has changed between day 0 and day 1. It is clearly seen that, for majority of glycans, CV decreased on day 1.

| Glycan Group | Day 0 CV % | Day 1 CV % | $\Delta$ CV % |
|--------------|------------|------------|---------------|
| GP1          | 47.42      | 58.51      | 23.4          |
| GP2          | 50.05      | 45.70      | -8.7          |
| GP3          | 30.93      | 29.87      | -3.4          |
| GP4          | 25.05      | 23.17      | -7.5          |
| GP5          | 19.60      | 19.47      | -0.7          |
| GP6          | 26.29      | 25.56      | -2.8          |
| GP7          | 43.47      | 37.75      | -13.2         |
| GP8          | 10.26      | 9.29       | -9.4          |
| GP9          | 14.35      | 12.49      | -12.9         |
| GP10         | 21.12      | 18.07      | -14.4         |
| GP11         | 17.51      | 15.47      | -11.7         |
| GP12         | 58.27      | 44.94      | -22.9         |
| GP13         | 28.72      | 25.19      | -12.3         |
| GP14         | 29.29      | 26.12      | -10.8         |
| GP15         | 24.90      | 21.67      | -13.0         |
| GP16         | 14.37      | 15.62      | 8.7           |
| GP17         | 24.23      | 20.62      | -14.9         |
| GP18         | 24.10      | 23.07      | -4.3          |
| GP19         | 21.51      | 18.85      | -12.4         |
| GP20         | 31.35      | 30.52      | -2.6          |
| GP21         | 30.35      | 27.95      | -7.9          |
| GP22         | 51.40      | 57.98      | 12.8          |
| GP23         | 29.56      | 33.35      | 12.8          |
| GP24         | 50.21      | 35.80      | -28.7         |



**Supplementary Table 4.** Pearson's correlation coefficients between glycan peaks and Euroscore at all times (Day 0, 1, 3) and time differences (Day 1 - Day 0, Day 3 - Day 0). Only the significant correlations ( $P < 0.05$ ) are shown. The rightmost column shows P values after post-hoc Bonferroni correction, highlighting the most significant correlations. As it can be shown, some peaks appear significant at all times (GP4, GP14) even after Bonferroni correction (GP9).

| Time                 | GP   | r (Pearson) | r <sup>2</sup> (Pearson) | P value     | P value (Bonferroni) |
|----------------------|------|-------------|--------------------------|-------------|----------------------|
| <b>Day 0</b>         | GP1  | 0.27511     | 0.075685512              | 0.00830917  | 0.9971004            |
|                      | GP3  | 0.242369    | 0.058742732              | 0.0206286   | 2.475432             |
|                      | GP4  | 0.386882    | 0.149677682              | 0.000151725 | <b>0.018207</b>      |
|                      | GP5  | 0.282441    | 0.079772918              | 0.00667719  | 0.8012628            |
|                      | GP6  | 0.330448    | 0.109195881              | 0.00137873  | 0.1654476            |
|                      | GP9  | -0.460705   | 0.212249097              | 4.32E-06    | <b>0.000518641</b>   |
|                      | GP13 | -0.333366   | 0.11113289               | 0.00124206  | 0.1490472            |
|                      | GP14 | -0.393533   | 0.154868222              | 0.000113804 | <b>0.01365648</b>    |
|                      | GP15 | -0.270782   | 0.073322892              | 0.0094294   | 1.131528             |
|                      | GP16 | -0.215448   | 0.046417841              | 0.0402684   | 4.832208             |
| <b>Day 1</b>         | GP18 | -0.320824   | 0.102928039              | 0.0019316   | 0.231792             |
|                      | GP4  | 0.330882    | 0.109482898              | 0.00135757  | 0.1629084            |
|                      | GP6  | 0.291523    | 0.08498566               | 0.00505227  | 0.6062724            |
|                      | GP9  | -0.386724   | 0.149555452              | 0.000152753 | <b>0.01833036</b>    |
|                      | GP13 | -0.331961   | 0.110198106              | 0.00130624  | 0.1567488            |
|                      | GP14 | -0.298485   | 0.089093295              | 0.00405534  | 0.4866408            |
|                      | GP15 | -0.226889   | 0.051478618              | 0.0305604   | 3.667248             |
|                      | GP18 | -0.260826   | 0.068030202              | 0.0125208   | 1.502496             |
| <b>Day 3</b>         | GP20 | -0.263958   | 0.069673826              | 0.0114648   | 1.375776             |
|                      | GP4  | 0.338907    | 0.114857955              | 0.00101587  | 0.1219044            |
|                      | GP6  | 0.303541    | 0.092137139              | 0.00344551  | 0.4134612            |
|                      | GP9  | -0.468507   | 0.219498809              | 2.82E-06    | <b>0.000338474</b>   |
|                      | GP14 | -0.323664   | 0.104758385              | 0.00175062  | 0.2100744            |
|                      | GP15 | -0.209288   | 0.043801467              | 0.0464818   | 5.577816             |
|                      | GP16 | -0.243865   | 0.059470138              | 0.0198353   | 2.380236             |
|                      | GP18 | -0.255544   | 0.065302736              | 0.0144943   | 1.739316             |
| <b>Day 1 - Day 0</b> | GP4  | -0.207474   | 0.043045461              | 0.0484566   | 5.814792             |
|                      | GP9  | 0.313843    | 0.098497429              | 0.00245028  | 0.2940336            |
|                      | GP14 | 0.266998    | 0.071287932              | 0.0105151   | 1.261812             |
| <b>Day 3 - Day 0</b> | GP21 | -0.23279    | 0.054191184              | 0.0263797   | 3.165564             |
|                      | GP5  | -0.210312   | 0.044231137              | 0.0453973   | 5.447676             |
|                      | GP14 | 0.23025     | 0.053015063              | 0.0281153   | 3.373836             |
|                      | GP21 | -0.225364   | 0.050788932              | 0.0317277   | 3.807324             |
